# Supplementary material for: Genome-wide studies reveal novel and distinct biological pathways regulated by SIN3 isoforms
Source: PubMed Central journal article supplement (PMC4752761; doi:10.1186/s12864-016-2428-5), 2016-02-13
Supplement: 12864_2016_2428_MOESM2_ESM.pdf [file 12864_2016_2428_MOESM2_ESM.pdf]

## Additional file 2

A

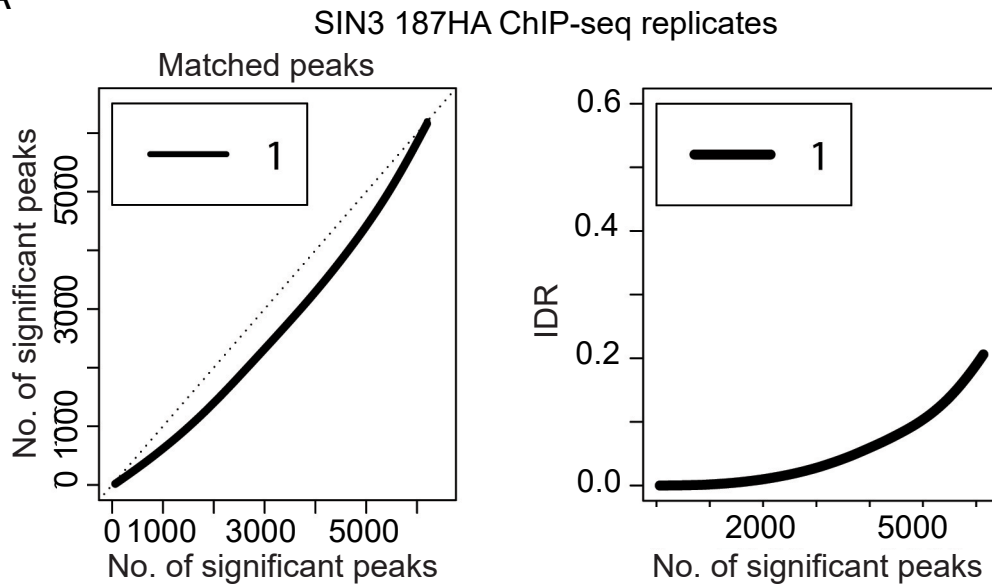

B

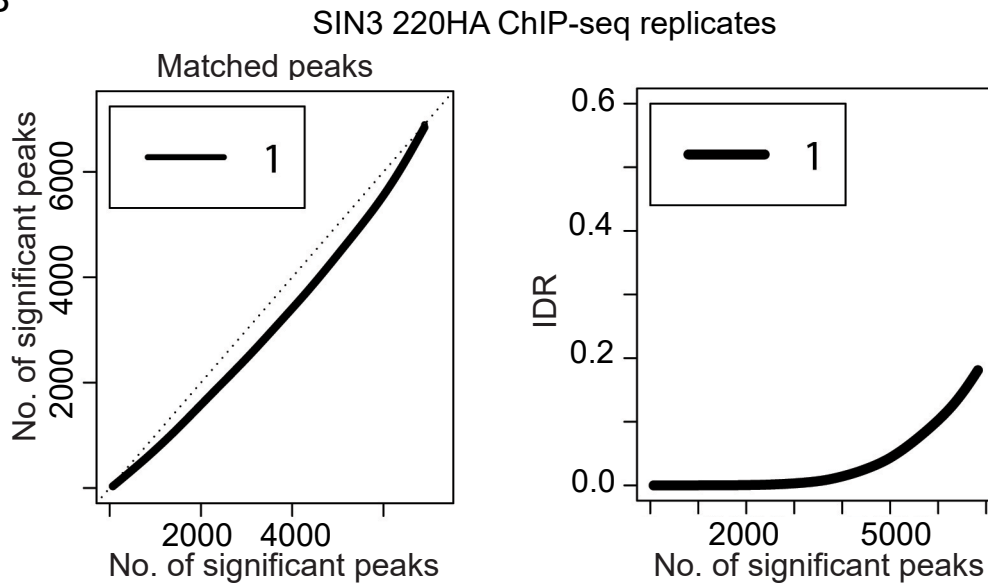

**Figure S2.** Irreproducible discovery rate (IDR) analysis showing the correlation between the two biological replicates of ChIP-seq analysis for SIN3 187HA samples (A) and SIN3 220HA samples (B). This figure is related to Figure 2, 3.
