# Supplementary material for: Genome-wide studies reveal novel and distinct biological pathways regulated by SIN3 isoforms
Source: PubMed Central journal article supplement (PMC4752761; doi:10.1186/s12864-016-2428-5), 2016-02-13
Supplement: 12864_2016_2428_MOESM11_ESM.pdf [file 12864_2016_2428_MOESM11_ESM.pdf]

## Additional file 11

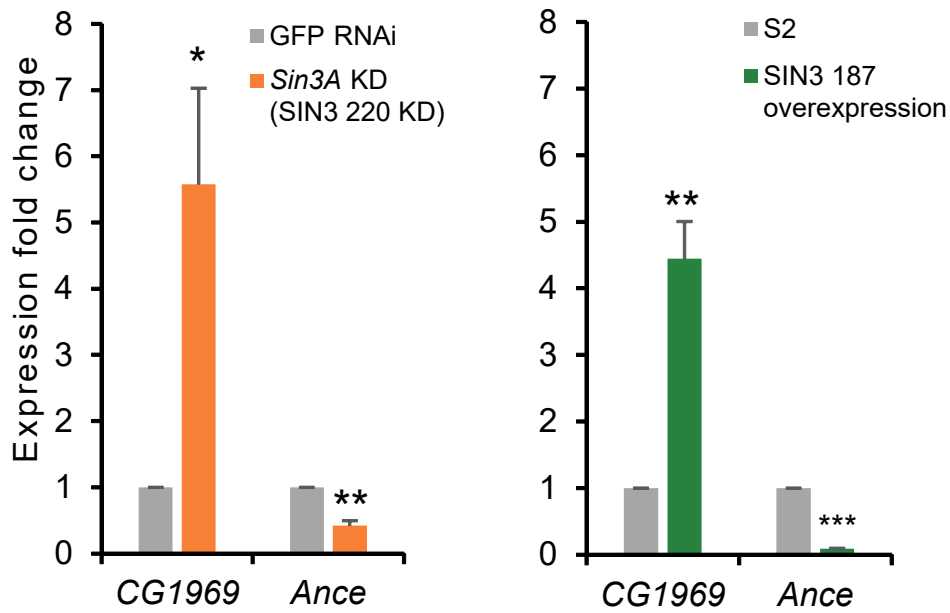

**Figure S7.** RT-qPCR verification of Class D genes. The level of *CG1969* mRNA is upregulated upon *Sin3A* (SIN3 220) knockdown or SIN3 187 overexpression indicating that this gene is repressed by SIN3 220 and activated by SIN3 187. Conversely, expression of *Ance* is downregulated due to alteration in the level of SIN3 isoforms demonstrating that SIN3 220 and SIN3 187 act as a co-activator or as a co-repressor, respectively.

This figure is related to Figure 5. *P*-value \* < 0.05, \*\* < 0.01, \*\*\* < 0.0001.
